# Supplementary material for: Rising wildfire risks in Europe fuelled by global warming
Source: Research Square preprint supplement (doi:10.21203/rs.3.rs-6362322/v1), 2025-04-03
Supplement: Supplementary file 1 [file e5cb0eab0df3ee852c4908d9.docx]

**Rising wildfire risks in Europe fuelled by global warming**

Diego Gomez1*, Giovanni Forzieri2, Corrado Motta3,4, Alessandro Dosio1, Alessandro Cescatti1, Paulo Barbosa5, Luc Feyen1

**Affiliations:**

1 European Commission, Joint Research Centre (JRC), Ispra, Italy

2Department of Civil and Environmental Engineering, University of Florence, Florence, Italy

3Arca Arcadia SIT, Vigevano, Italy.

4Department of Civil, Environmental and Mechanical Engineering, University of Trento, Trento, Italy.

5 European Commission, Joint Research Centre (JRC), Seville, Spain

***Corresponding author:** [diego.gomez-aragon@ec.europa.eu](mailto:diego.gomez-aragon@ec.europa.eu)

**Supplementary information**

**Contents**

S1. Reported asset loss rates for wildfires

S2. Uncertainty in economic losses

S3. Additional figures and tables

**S1. Reported asset loss rates for wildfires**

Reported damages from recent wildfire events indicate that the damage to fixed assets (FA) in the burned areas (BA) varies widely. For instance, from more than 40,000 structures that were burnt by wildfires between 2013 to 2018 in California, approximately 90% of them were fully destroyed, while the other 10% were only partially damaged 1. Between 2015 and 2021, nine northern California wildfires threatened 26,915 single-family homes, with 79.8% (21,504) ultimately destroyed 2. The impact on structures of the Pedrógão Grande Fire Complex in June 2017 (Portugal) shows that of the 1,043 inventoried, over 1,000 were highly damaged or completely destroyed 3. According to 4, an analysis of large wildfire incidents in Sweden reveals that out of 187 buildings located within the fire zones, the majority of which presented wooden panelling and either tile or sheet metal roofs, approximately 35% sustained significant damage or were completely destroyed. In the Santa Monica Mountains, 3% of 36,399 structures were located within the boundaries of 10 large fires that occurred from 2001 to 2009. In these fires, 173 homes, guesthouses, or outbuildings were destroyed and an additional 140 were damaged. For the second study region in San Diego County, 4% of 687,869 structures were located within 40 fire perimeters. In these fires, 4315 structures were completely destroyed and an additional 935 were damaged 5. The most recent extreme case, the Palisades Fire (US) in January 2025, has affected more than 23,448 ha, resulting in over 6,837 structures destroyed and 1,017 damaged out of 12,317 threatened structures, representing approximately 55% of total asset value 6.

**S2. Uncertainty in economic losses**

In our study, we identify three key sources of uncertainty that affect our estimates of economic damages from wildfires. First, there are uncertainties linked to climate that emerge from the variability among climate model ensembles. According to studies, employing a selection of 10 RCM-GCM combinations for two RCP scenarios is sufficient to encapsulate the key climate patterns in Europe 7. In addition, the reliability of changes in both mean and extreme climate indices across Europe has been demonstrated with the same ensemble of climate models used in this analysis 8. We consider the second lowest and second highest estimate in the ensemble as uncertainty range, which for the baseline, 1.5 and 2°C corresponds (ensemble of 20 projections) approximates to the 5th and 95th percentile, while for 3 (9 projections) and 4°C (10 projections) this corresponds roughly to the 10th and 90th percentiles.

Secondly, we account for uncertainties in the probabilistic Random Forest (RF) model used to estimate burnt areas (BA). This includes potential bias in capturing complex relationships between the range of explanatory variables, which can be amplified by issues such as the representativeness and accuracy of input data, including spatial and temporal coverage, as well as measurement errors (Forzieri et al., 2021; Forzieri et al., 2024). To capture this uncertainty, we consider for each climate realization the 5 and 95th percentile of the BA estimates across the 500 trees in the RF model predictions. It is important to note that the RF model does not account for certain factors that can influence the severity of wildfires, and consequently the impacts, such as fire intensity. Fire intensity can vary greatly depending on short-term weather conditions, fuel loads, and topography 9 and these variations can significantly affect the degree of damage in FA.

Third, as previously discussed in Section S1, the susceptibility of fixed assets (FA) to be destroyed by wildfires varies significantly based on the burnable materials and structures present. For example, buildings made from flammable materials or located in areas with high fuel loads may be more prone to damage or destruction. Recognizing that not all FA have the same vulnerability, we quantified this uncertainty by estimating impacts using a pragmatic range of vulnerability assumptions - spanning from 25% to 75%. This range provides a sense of the potential variability in the reported damage loss rates.

By integrating these multiple sources of uncertainty - climate, RF model, and vulnerability - we quantify an overall uncertainty in our estimates of the potential economic damages from wildfires.

**S3. Additional figures and tables**


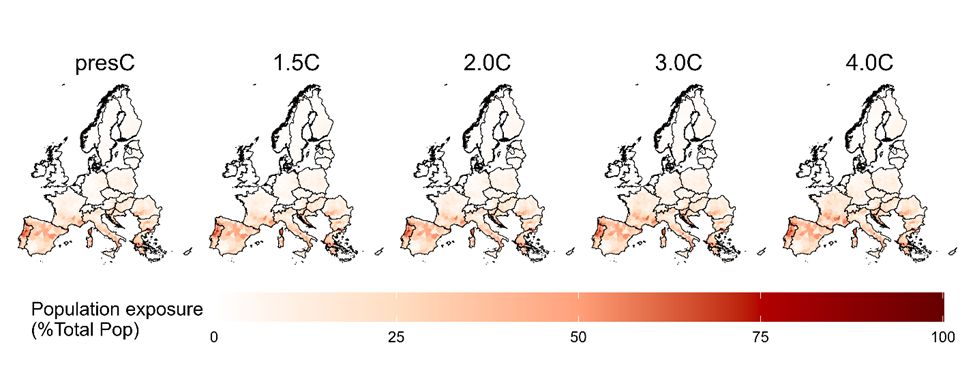


*Figure S1. Annual mean population exposure in WUI to high-to-very-extreme fire danger at NUTS 3 level for present climate conditions (1991-2020) and climate projections under 1.5°C, 2.0°C, 3.0°C, and 4.0°C global warming levels. Values represent the ensemble mean estimate of the percentage of population exposed with respect to the total population of the NUTS3.*


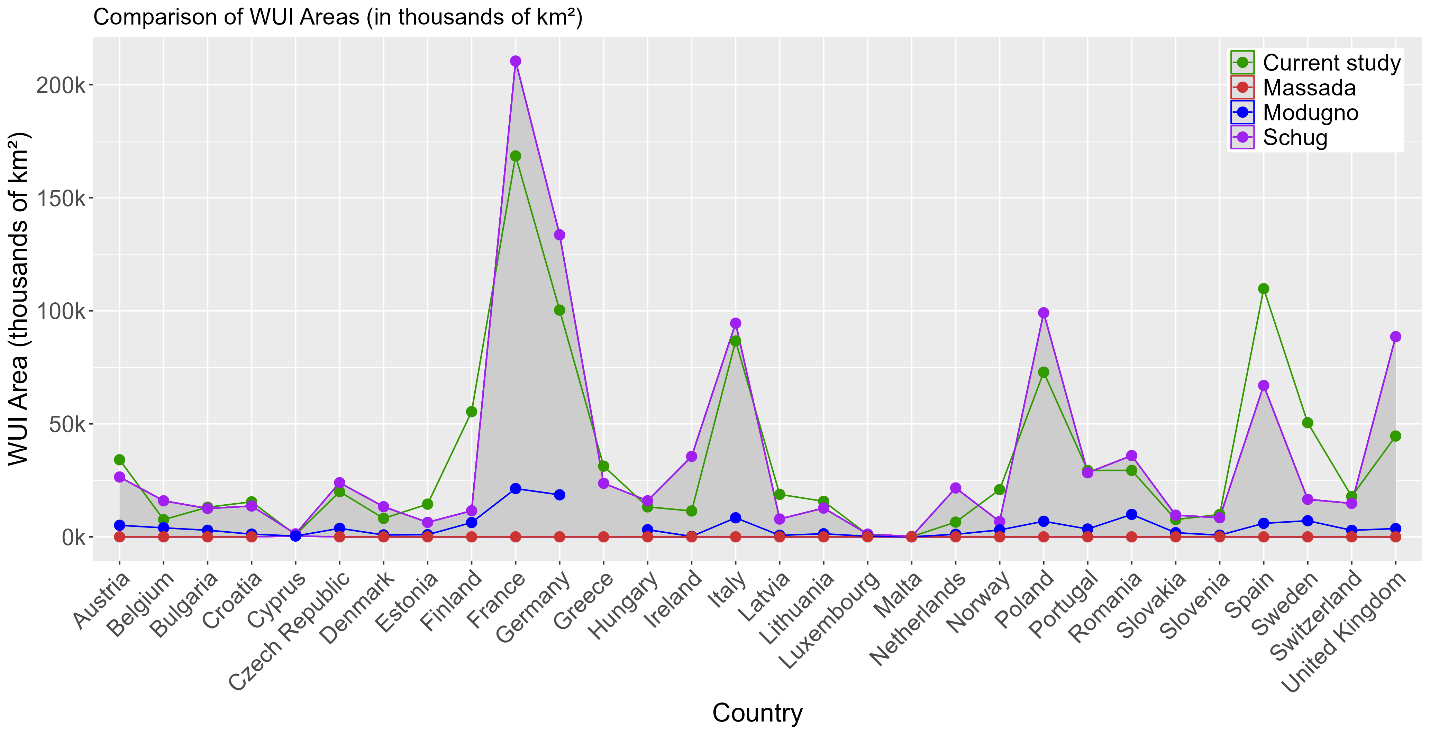


*Figure S2. Comparison of the estimated WUI areas (km2) per NUTS0 in the study area (EU27+3) by different authors/methods.*


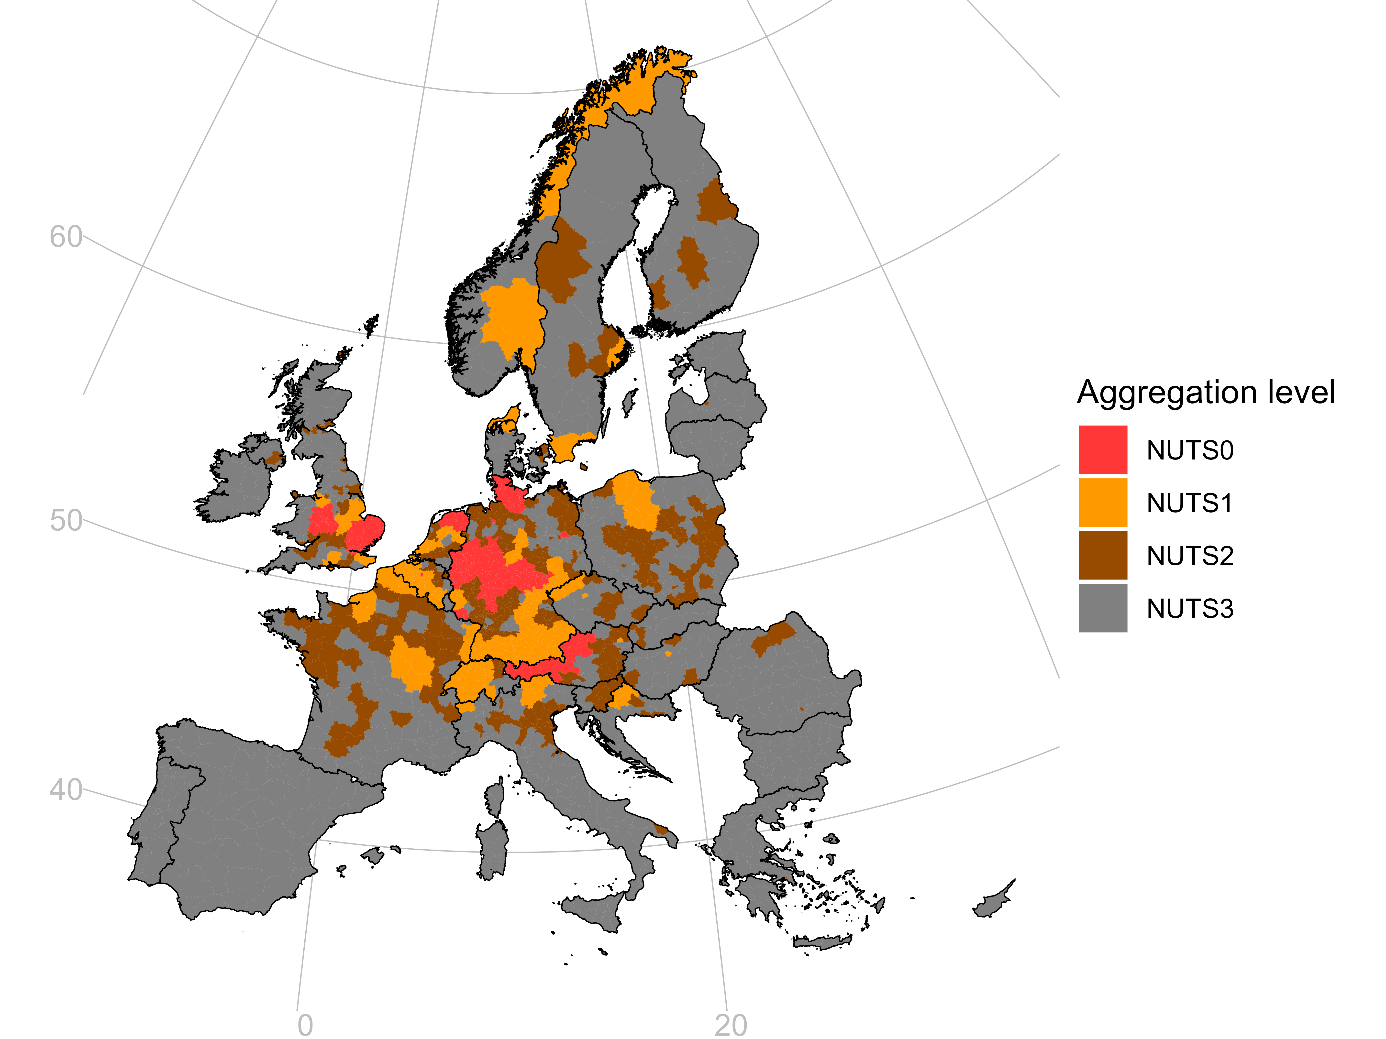


*Figure S3. Map showing the level of NUTS aggregation used for each region to extrapolate historical burnt area statistics to other flammable land use classes. If no historical records of forest burnt are available at NUTS3, it goes to an upper level*


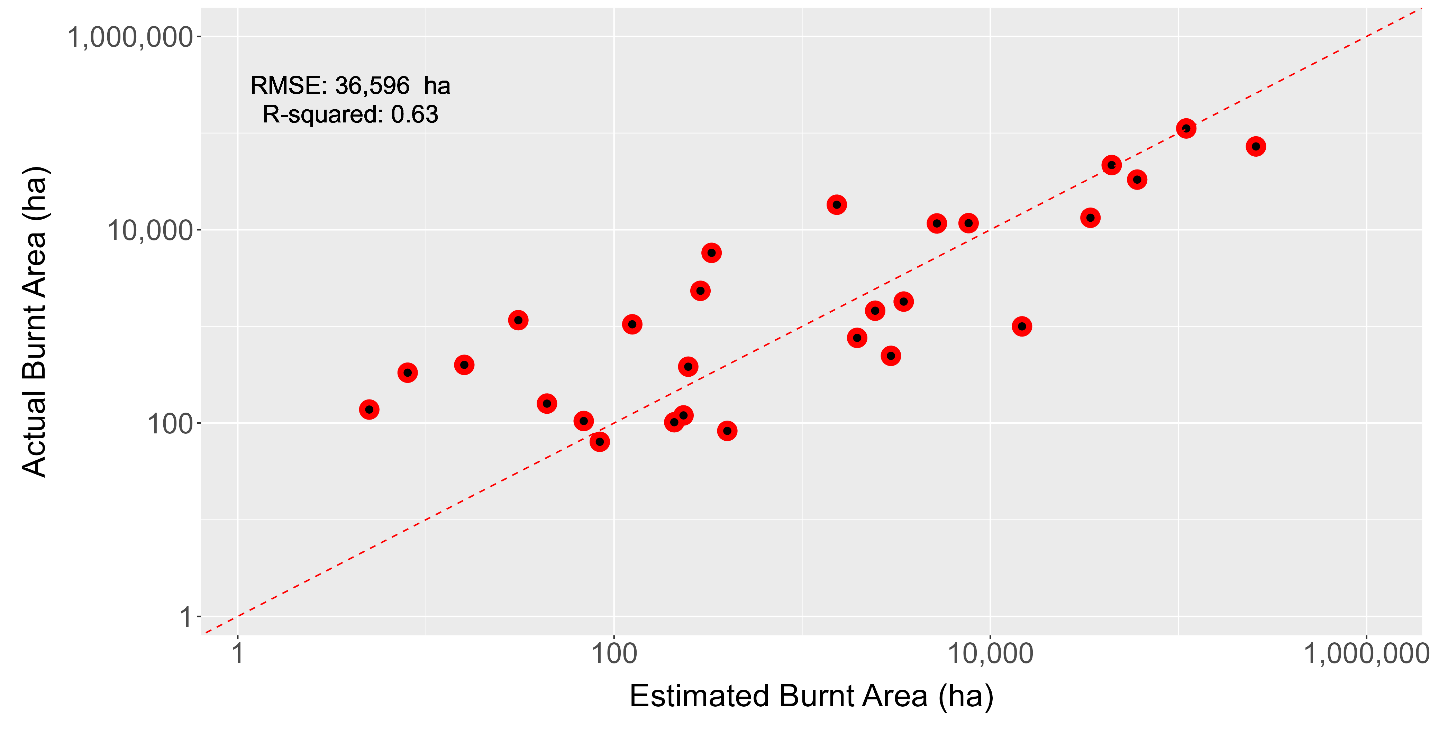


*Figure S4. Comparison between reported and estimated burnt areas at the national level (NUTS0) for the period 2000-2022. The reported areas are sourced from the European Forest Fire Information System (EFFIS), while estimated areas are derived from average estimates for each climate model simulation and Representative Concentration Pathway (RCP). These projections are then averaged across all models. Countries with reported burnt areas below the EFFIS threshold of uncertainty, which is 30 hectares, were omitted from the illustration (Luxembourg, Switzerland, and Malta).*

| NUTS0 | Absolute exposure (in thousands) | | | | | | Relative exposure to the total pop. (%) | | | | | |
| --- | --- | --- | --- | --- | --- | --- | --- | --- | --- | --- | --- | --- |
| **PresC** | **1.5C** | **2.0C** | **3.0C** | **4.0C** | **PresC** | | **1.5C** | **2.0C** | **3.0C** | **4.0C** |
| AT | [166.3, 1281.3] | [205.4, 1161.1] | [279.3, 1353.1] | [316.1, 1554.5] | [464.9, 1709.5] | [1.9, 14.3] | | [2.3, 13] | [3.1, 15.1] | [3.5, 17.4] | [5.2, 19.1] |
| BE | [6.8, 445.9] | [1.4, 554.4] | [26.1, 641.4] | [15.9, 619.4] | [52.5, 849.8] | [0.1, 3.8] | | [0, 4.8] | [0.2, 5.5] | [0.1, 5.3] | [0.5, 7.3] |
| BG | [1030.1, 1301.9] | [1135.6, 1274.3] | [1159.8, 1275.1] | [1224.7, 1262.8] | [1227.7, 1263.9] | [15, 18.9] | | [16.5, 18.5] | [16.8, 18.5] | [17.8, 18.3] | [17.8, 18.3] |
| CH | [5, 759.4] | [17.1, 814.4] | [47, 1107.6] | [59.1, 1460.6] | [123.8, 1883] | [0.1, 8.8] | | [0.2, 9.5] | [0.5, 12.9] | [0.7, 16.9] | [1.4, 21.9] |
| CY | [113.4, 113.4] | [113.7, 113.7] | [113.2, 113.2] | [113.2, 113.2] | [113.2, 113.2] | [12.6, 12.6] | | [12.6, 12.6] | [12.6, 12.6] | [12.6, 12.6] | [12.6, 12.6] |
| CZ | [218.1, 1371.3] | [234.8, 1259.7] | [328.8, 1201.6] | [404.3, 1356.8] | [361, 1652.4] | [2, 12.8] | | [2.2, 11.8] | [3.1, 11.2] | [3.8, 12.7] | [3.4, 15.4] |
| DE | [228.4, 7302.5] | [502.8, 6571.4] | [1239.9, 7054] | [1765.7, 8915.2] | [808.1, 11092.9] | [0.3, 8.8] | | [0.6, 7.9] | [1.5, 8.5] | [2.1, 10.7] | [1, 13.3] |
| DK | [0, 191.5] | [0, 183.7] | [0, 215.5] | [0, 207.7] | [8.5, 234.2] | [0, 3.3] | | [0, 3.1] | [0, 3.7] | [0, 3.5] | [0.1, 4] |
| EE | [0, 165.6] | [0, 169.7] | [0, 168.6] | [0, 102.3] | [0, 83.1] | [0, 12.5] | | [0, 12.8] | [0, 12.7] | [0, 7.7] | [0, 6.3] |
| EL | [2066.6, 2154.2] | [2063.8, 2151.4] | [2064.8, 2152.4] | [2067.8, 2158.8] | [2068.4, 2161.5] | [19.4, 20.2] | | [19.3, 20.2] | [19.4, 20.2] | [19.4, 20.2] | [19.4, 20.3] |
| ES | [7194.1, 9944.1] | [7817.9, 10091.8] | [7981.2, 10248.3] | [8844, 10162.9] | [9186.5, 10278.9] | [15.2, 21] | | [16.5, 21.3] | [16.9, 21.7] | [18.7, 21.5] | [19.4, 21.7] |
| FI | [0, 968.7] | [0, 1076.5] | [0, 963] | [0, 846] | [0.1, 925.1] | [0, 17.5] | | [0, 19.4] | [0, 17.4] | [0, 15.3] | [0, 16.7] |
| FR | [2851.1, 10199.1] | [3461.2, 10758.6] | [3816.6, 11752.5] | [5659.6, 11843.7] | [6272.9, 13799] | [4.3, 15.5] | | [5.3, 16.4] | [5.8, 17.9] | [8.6, 18] | [9.5, 21] |
| HR | [561.2, 1174.7] | [618.2, 1172.6] | [605.6, 1173] | [694.6, 1178.3] | [859.3, 1205.4] | [14.4, 30.2] | | [15.9, 30.2] | [15.6, 30.2] | [17.9, 30.3] | [22.1, 31] |
| HU | [779.9, 1756.5] | [1050.9, 1750.5] | [1174.5, 1771.7] | [1337.5, 1727.6] | [1634.9, 1777.3] | [8, 18.1] | | [10.8, 18] | [12.1, 18.2] | [13.8, 17.8] | [16.8, 18.3] |
| IE | [0, 17.9] | [0, 20.6] | [0, 16.7] | [0, 17.8] | [0, 28.5] | [0, 0.4] | | [0, 0.4] | [0, 0.3] | [0, 0.4] | [0, 0.6] |
| IT | [6148.6, 10687.3] | [6715, 10733.6] | [6338.4, 10787.3] | [7668.3, 10833.8] | [7983.2, 10887.4] | [10.4, 18.1] | | [11.4, 18.2] | [10.7, 18.2] | [13, 18.3] | [13.5, 18.4] |
| LT | [0, 332.4] | [0.4, 269.3] | [1.2, 270.1] | [1.3, 172.9] | [12.9, 210.5] | [0, 11.9] | | [0, 9.6] | [0, 9.6] | [0, 6.2] | [0.5, 7.5] |
| LU | [0, 86.6] | [0, 82.6] | [0.9, 100] | [16.5, 119.7] | [8.4, 157.8] | [0, 13.5] | | [0, 12.9] | [0.1, 15.6] | [2.6, 18.7] | [1.3, 24.6] |
| LV | [0, 271.7] | [0, 261.3] | [0.2, 254.6] | [6.8, 159.9] | [7.1, 142.5] | [0, 14.4] | | [0, 13.9] | [0, 13.5] | [0.4, 8.5] | [0.4, 7.6] |
| MT | [0, 45.4] | [0, 45.4] | [0, 49.4] | [0, 56.2] | [0, 51.1] | [0, 8.7] | | [0, 8.7] | [0, 9.5] | [0, 10.8] | [0, 9.8] |
| NL | [6.9, 603.4] | [9.8, 622.7] | [7.3, 633.2] | [52.9, 587.1] | [58.6, 719.6] | [0, 3.4] | | [0.1, 3.6] | [0, 3.6] | [0.3, 3.3] | [0.3, 4.1] |
| NO | [0, 233] | [0, 178.4] | [0, 230.1] | [0.3, 200.5] | [0.6, 231.5] | [0, 4.4] | | [0, 3.4] | [0, 4.3] | [0, 3.8] | [0, 4.3] |
| PL | [728.7, 5880.2] | [521.8, 5215.5] | [851.4, 5725.7] | [1447.4, 3959.6] | [1347.2, 4925.4] | [1.9, 15.4] | | [1.4, 13.7] | [2.2, 15] | [3.8, 10.4] | [3.5, 12.9] |
| PT | [3439, 3843.6] | [3633, 3839.9] | [3729.5, 3836.8] | [3816.5, 3835.8] | [3823.1, 3835.9] | [33.4, 37.3] | | [35.3, 37.3] | [36.2, 37.3] | [37.1, 37.3] | [37.1, 37.3] |
| RO | [1471.4, 3053.1] | [1794.6, 2977.1] | [1667.4, 2997.8] | [2006.8, 2964.2] | [2252.3, 3089.9] | [7.7, 15.9] | | [9.3, 15.5] | [8.7, 15.6] | [10.5, 15.4] | [11.7, 16.1] |
| SE | [1, 1004.6] | [0.4, 876.9] | [0.5, 1089.3] | [1.2, 820.6] | [16, 965.4] | [0, 9.6] | | [0, 8.4] | [0, 10.5] | [0, 7.9] | [0.2, 9.3] |
| SI | [65.1, 953.8] | [109, 934.2] | [126.1, 923.4] | [118.4, 956.9] | [256.8, 1015.6] | [3.1, 45.2] | | [5.2, 44.3] | [6, 43.8] | [5.6, 45.4] | [12.2, 48.2] |
| SK | [116.7, 717.8] | [158.1, 657.5] | [221.6, 678] | [282.8, 730] | [398.9, 828.4] | [2.1, 13.2] | | [2.9, 12.1] | [4.1, 12.4] | [5.2, 13.4] | [7.3, 15.2] |
| UK | [8.5, 1431.6] | [24.5, 1364.4] | [20.1, 1682.2] | [100.5, 1257.3] | [160.9, 1668.4] | [0, 2.1] | | [0, 2] | [0, 2.5] | [0.1, 1.9] | [0.2, 2.5] |
| TOTAL | **[30178.8, 63479.4]** | **[32481.5, 61304.2]** | **[36917.6, 64048.5]** | **[43612.8, 66424.5]** | **[43465.1, 74223.6]** | **[5.7, 12.1]** | | **[6.2, 11.6]** | **[7, 12.2]** | **[8.3, 12.6]** | **[8.3, 14.1]** |

*Table S1. Range between lower and upper bounds of the number of people (in thousands) exposed to high fire danger for at least 7 days a year in EU27 countries, Norway, Switzerland, and the UK. The range reflects variability in climate projections within the ensemble and accounts for uncertainty in exposure estimates. Corresponding relative exposure as a percentage of the total population is included.*

| NUTS0 | PresC | 1.5C | 2.0C | 3.0C | 4.0C |
| --- | --- | --- | --- | --- | --- |
| AT | [0,12.52] | [0.02,54.1] | [0.08,62.81] | [1.87,129.28] | [10.34,318.38] |
| BE | [0,1.1] | [0,1.92] | [0,2.92] | [0.12,5.63] | [0.34,11.69] |
| BG | [3.61,110.99] | [6.05,150.41] | [8.36,247.5] | [24.14,323.18] | [30.82,432.1] |
| CH | [0.01,11.63] | [0.04,15.16] | [0.25,61.16] | [2.28,195.37] | [5.44,241.79] |
| CY | [10.89,93.8] | [8.4,67.61] | [9.82,73.97] | [8.37,61.51] | [7.73,74.85] |
| CZ | [0.31,7.19] | [0.32,6.93] | [0.62,11.31] | [1.46,23.45] | [4.38,60.57] |
| DE | [3.27,868.77] | [3.28,1351.79] | [9.19,1696.94] | [59.39,3123.94] | [186.85,5774.05] |
| DK | [0,0.18] | [0,1.04] | [0,0.82] | [0,0.81] | [0,1.88] |
| EE | [0,0.29] | [0,0.48] | [0,0.55] | [0,0.46] | [0,0.13] |
| EL | [44.8,831.81] | [53.7,955.82] | [54.99,956.99] | [65.39,925.26] | [64.84,868.46] |
| ES | [170.12,1125.73] | [172.72,1307.94] | [178.24,1425.07] | [192.21,1215.79] | [189.28,1244.02] |
| FI | [0.29,23.37] | [0.12,105.77] | [0.12,203.43] | [1.65,331.26] | [3.83,381.46] |
| FR | [113.36,1062.53] | [127.79,1212.48] | [145.86,1418.21] | [224.83,1670.96] | [282.24,2082.2] |
| HR | [3.55,90.75] | [7.11,98.42] | [6.37,113.63] | [11.97,123.63] | [15.52,154.91] |
| HU | [0.25,34.11] | [1.17,67.71] | [1.79,75.39] | [6.3,107.46] | [15.14,159.4] |
| IE | [0.11,1.48] | [0.1,1.59] | [0.07,1.41] | [0.18,2.96] | [0.11,1.52] |
| IT | [134.24,2081.11] | [163.33,2641.41] | [196.23,2329.83] | [240.85,2668.26] | [259.26,2599.77] |
| LT | [0,0.29] | [0,0.35] | [0,1.24] | [0,1.63] | [0,2.03] |
| LU | [0.47,6.34] | [0.43,7.79] | [0.52,10.55] | [1.39,14.09] | [4.76,36.58] |
| LV | [0,0.81] | [0,0.63] | [0,1.06] | [0,3] | [0,1.23] |
| MT | [0,1.74] | [0,2.02] | [0,1.68] | [0,1.46] | [0,1.42] |
| NL | [0.21,49.03] | [0.06,43.67] | [0.14,104.2] | [3.05,307.06] | [8.11,314.41] |
| NO | [0.16,4.84] | [0.23,4.64] | [0.21,3.58] | [0.29,3.4] | [0.27,3.04] |
| PL | [0,3.92] | [0,8.23] | [0,15.34] | [0.39,71.41] | [4.27,221.6] |
| PT | [117.44,1296.84] | [133.77,1230.94] | [149.37,1232.62] | [173.33,1229.7] | [183.48,1202.85] |
| RO | [0.12,9.88] | [0.24,21.44] | [0.37,24.29] | [1.22,32.49] | [2.71,44.33] |
| SE | [0.57,5.03] | [0.57,5.52] | [0.57,5.76] | [0.58,4.91] | [0.54,5.8] |
| SI | [0.05,5.12] | [0.21,9.71] | [0.36,14.38] | [1.25,15.77] | [2.94,27.38] |
| SK | [0,1.62] | [0.03,10.24] | [0.07,24.19] | [2.33,50.72] | [6.45,88.38] |
| UK | [0.01,2.56] | [0.02,2.44] | [0.01,2.07] | [0.12,6.04] | [0.61,18.29] |
| TOTAL | **[604.8,7785.5]** | **[681.2,9412.2]** | **[765.3,10136.7]** | **[1040.1,12670.2]** | **[1326.8,16398.0]** |

*Table S2. Uncertainty bounds of expected annual damage (EAD) (in € million, 2020 values) by country and aggregated over the study area for present climate conditions (1991-2020, PresC) and climate scenarios of 1.5°C, 2.0°C, 3.0°C, and 4.0°C global warming. The bounds are expressed as ranges [lower bound, upper bound] to capture the variability in economic loss estimates.*

| **RMC (R)** | **Driving GCM (G)** | **RCP4.5** | **RCP8.5** | **RCP4.5** | **RCP8.5** | **RCP4.5** | **RCP8.5** | **RCP4.5** | **RCP8.5** |
| --- | --- | --- | --- | --- | --- | --- | --- | --- | --- |
| **1.5 ˚C** | | **2.0 ˚C** | | **3.0 ˚C** | | **4.0 ˚C** | |
| **CCLM4.8-17** | CNRM-CERFACS-CNRM-CM5 | 2035 | 2029 | 2057 | 2044 | - | 2067 | - | 2089 |
| ICHEC-EC-EARTH | 2033 | 2026 | 2056 | 2041 | - | 2066 | - | 2090 |
| MPI-M-MPI-ESM-LR | 2034 | 2028 | 2064 | 2044 | - | 2067 | - | 2089 |
| **HIRHAM5** | HIRHAM5-ICHEC-EC-EARTH | 2032 | 2028 | 2054 | 2043 | - | 2065 | - | 2086 |
| **RACMO22E** | ICHEC-EC-EARTH | 3032 | 2026 | 2056 | 2042 | - | 2065 | - | 2087 |
| **RCA4** | CNRM-CERFACS-CNRM-CM5 | 2035 | 2029 | 2057 | 2044 | - | 2067 | - | 2089 |
| ICHEC-EC-EARTH | 2033 | 2026 | 2056 | 2041 | - | 2066 | - | 2090 |
| IPSL-IPSL-CM5A-MR | 2023 | 2021 | 2042 | 2035 | - | 2054 | - | 2073 |
| MOHC-HadGEM2-ES | 2021 | 2018 | 2037 | 2030 | 2069 | 2051 | - | 2071 |
| MPI-M-MPI-ESM-LR | 2034 | 2028 | 2064 | 2044 | - | 2067 | - | 2089 |

Table S3. This table indicates the central year within a 30-year timeframe when specific warming levels are projected to be reached, as per the data from ten different climate models. For those models predicting a 4 ˚C increase in temperature after 2085, the average is computed based on the reference period from 2071-2100.

**Bibliography (Supplementary materials)**

1. Syphard, A. D. & Keeley, J. E. Factors Associated with Structure Loss in the 2013–2018 California Wildfires. *Fire* **2**, 49 (2019).

2. Schmidt, J. The Effects of Vegetation, Structure Density, and Wind on Structure Loss Rates in Recent Northern California Wildfires. https://mpra.ub.uni-muenchen.de/112191/ (2022).

3. Ribeiro, L. M., Rodrigues, A., Lucas, D. & Viegas, D. X. The Impact on Structures of the Pedrógão Grande Fire Complex in June 2017 (Portugal). *Fire* **3**, 57 (2020).

4. Vermina Plathner, F., Sjöström, J. & Granström, A. Garden structure is critical for building survival in northern forest fires – An analysis using large Swedish wildfires. *Saf. Sci.* **157**, 105928 (2023).

5. Syphard, A. D., Keeley, J. E., Massada, A. B., Brennan, T. J. & Radeloff, V. C. Housing Arrangement and Location Determine the Likelihood of Housing Loss Due to Wildfire. *PLOS ONE* **7**, e33954 (2012).

6. CAL-FIRE. Palisades Fire | CAL FIRE. https://www.fire.ca.gov/incidents/2025/1/7/palisades-fire (2025).

7. Annan, J. D. & Hargreaves, J. C. On the meaning of independence in climate science. *Earth Syst. Dyn.* **8**, 211–224 (2017).

8. Dosio, A. & Fischer, E. M. Will Half a Degree Make a Difference? Robust Projections of Indices of Mean and Extreme Climate in Europe Under 1.5°C, 2°C, and 3°C Global Warming. *Geophys. Res. Lett.* **45**, 935–944 (2018).

9. Wasserman, T. N. & Mueller, S. E. Climate influences on future fire severity: a synthesis of climate-fire interactions and impacts on fire regimes, high-severity fire, and forests in the western United States. *Fire Ecol.* **19**, 43 (2023).
